# Supplementary material for: The effect of drinking water pH on the human gut microbiota and glucose regulation: results of a randomized controlled cross-over intervention
Source: PubMed Central journal article supplement (PMC6226457; doi:10.1038/s41598-018-34761-5), 2018-11-09
Supplement: 41598_2018_34761_MOESM1_ESM.pdf [file 41598_2018_34761_MOESM1_ESM.pdf]

# SUPPLEMENTARY TABLES AND FIGURES

## THE EFFECT OF DRINKING WATER PH ON THE HUMAN GUT MICROBIOTA AND GLUCOSE REGULATION: RESULTS OF A RANDOMIZED CONTROLLED CROSS-OVER INTERVENTION

Tue H. Hansen<sup>1</sup>, Mette T. Thomassen<sup>1</sup>, Mia L. Madsen<sup>1</sup>, Timo Kern<sup>1</sup>, Emilie G. Bak<sup>1</sup>, Alireza Kashani<sup>1</sup>,  
Kristine H. Allin<sup>1,2</sup>, Torben Hansen<sup>1,3</sup>, Oluf Pedersen<sup>1</sup>

- 1 The Novo Nordisk Foundation Center for Basic Metabolic Research, Section of Metabolic Genetics, Faculty of Health and Medical Sciences University of Copenhagen, Denmark
- 2 Department of Clinical Epidemiology, Bispebjerg and Frederiksberg Hospital, the Capital Region, Copenhagen, Denmark
- 3 Faculty of Health Sciences, University of Southern Denmark, Odense, Denmark

FIGURE S1. FOREST PLOT OF INTERVENTION EFFECT ON ALPHA DIVERSITY

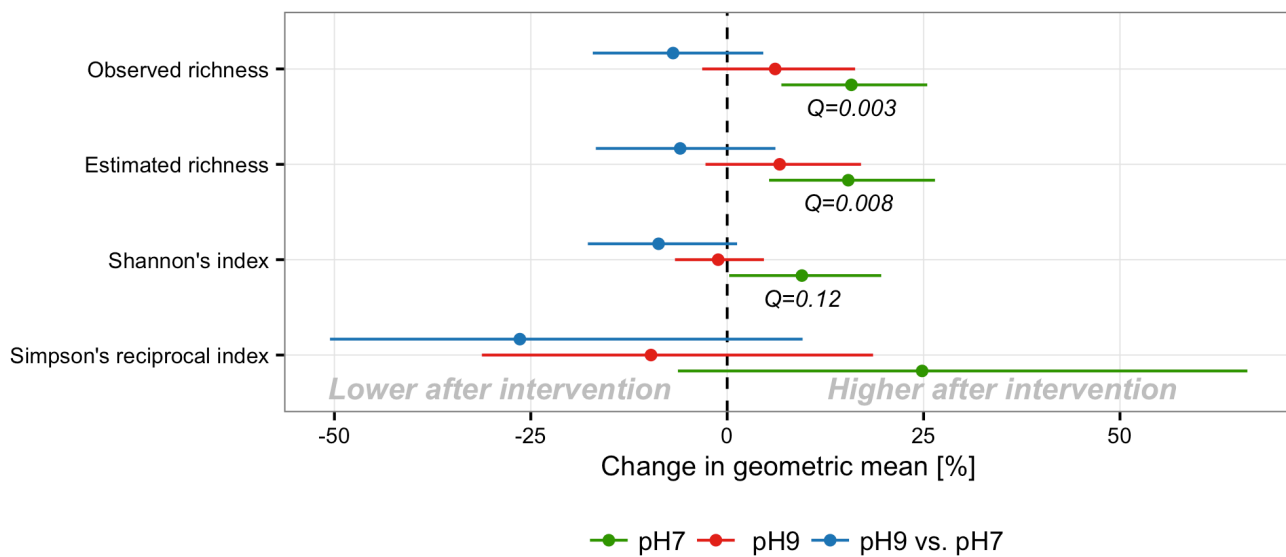

Forest plot of effect estimates (% change in geometric means) and 95% confidence intervals from linear mixed models. Estimates of the effect of the individual interventions (pH7 and pH9) and the contrast between them (pH9 vs. pH7) are depicted separately. Q-values generated *ad modum* Benjamini-Hochberg are shown in case of nominal significance.

FIGURE S2. BASELINE COMPOSITION AT PHYLUM, CLASS AND ORDER LEVEL

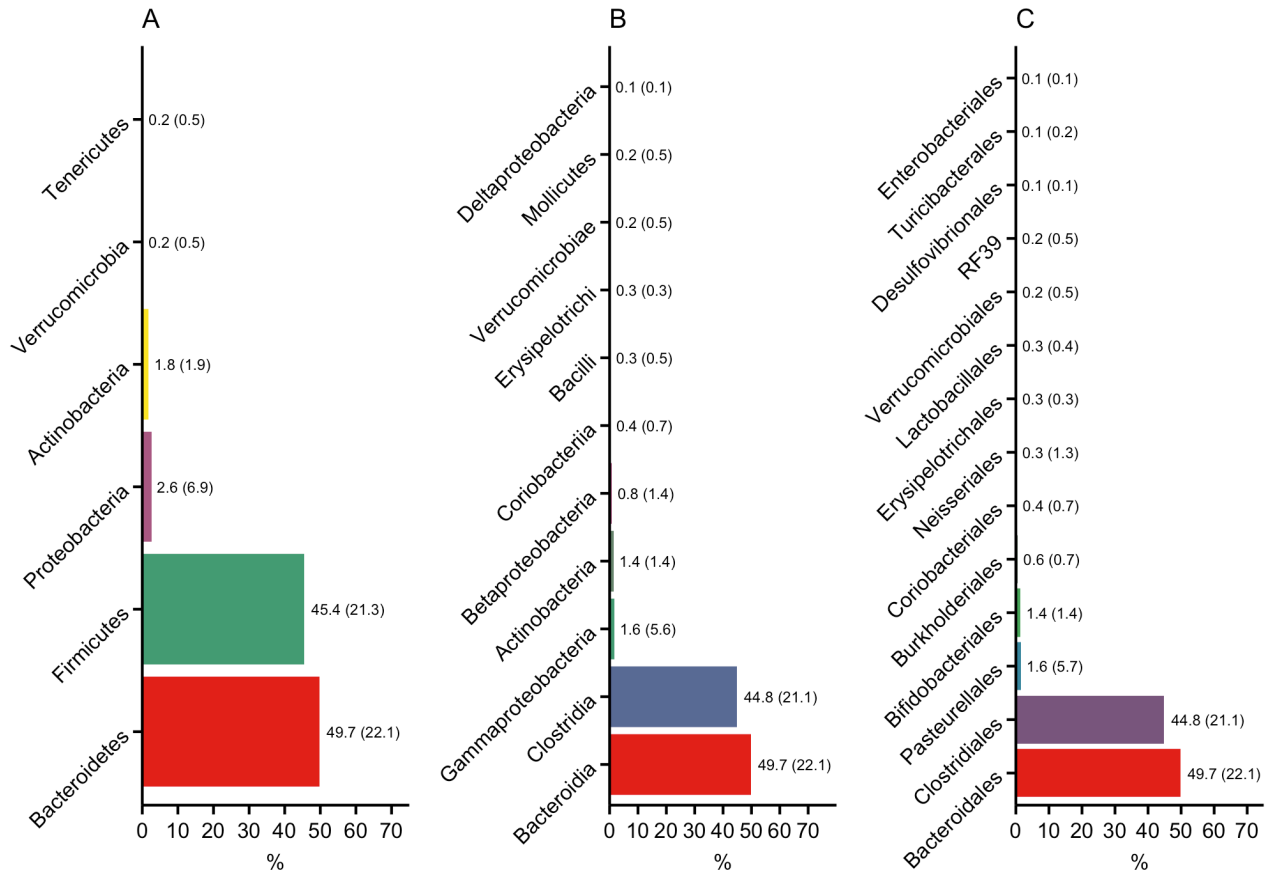

Mean relative abundance (standard error) at phylum [A], class [B] and order [C] level of the 201 core OTUs in baseline samples from all participants.

FIGURE S3. BASELINE COMPOSITION AT FAMILY AND GENUS LEVEL

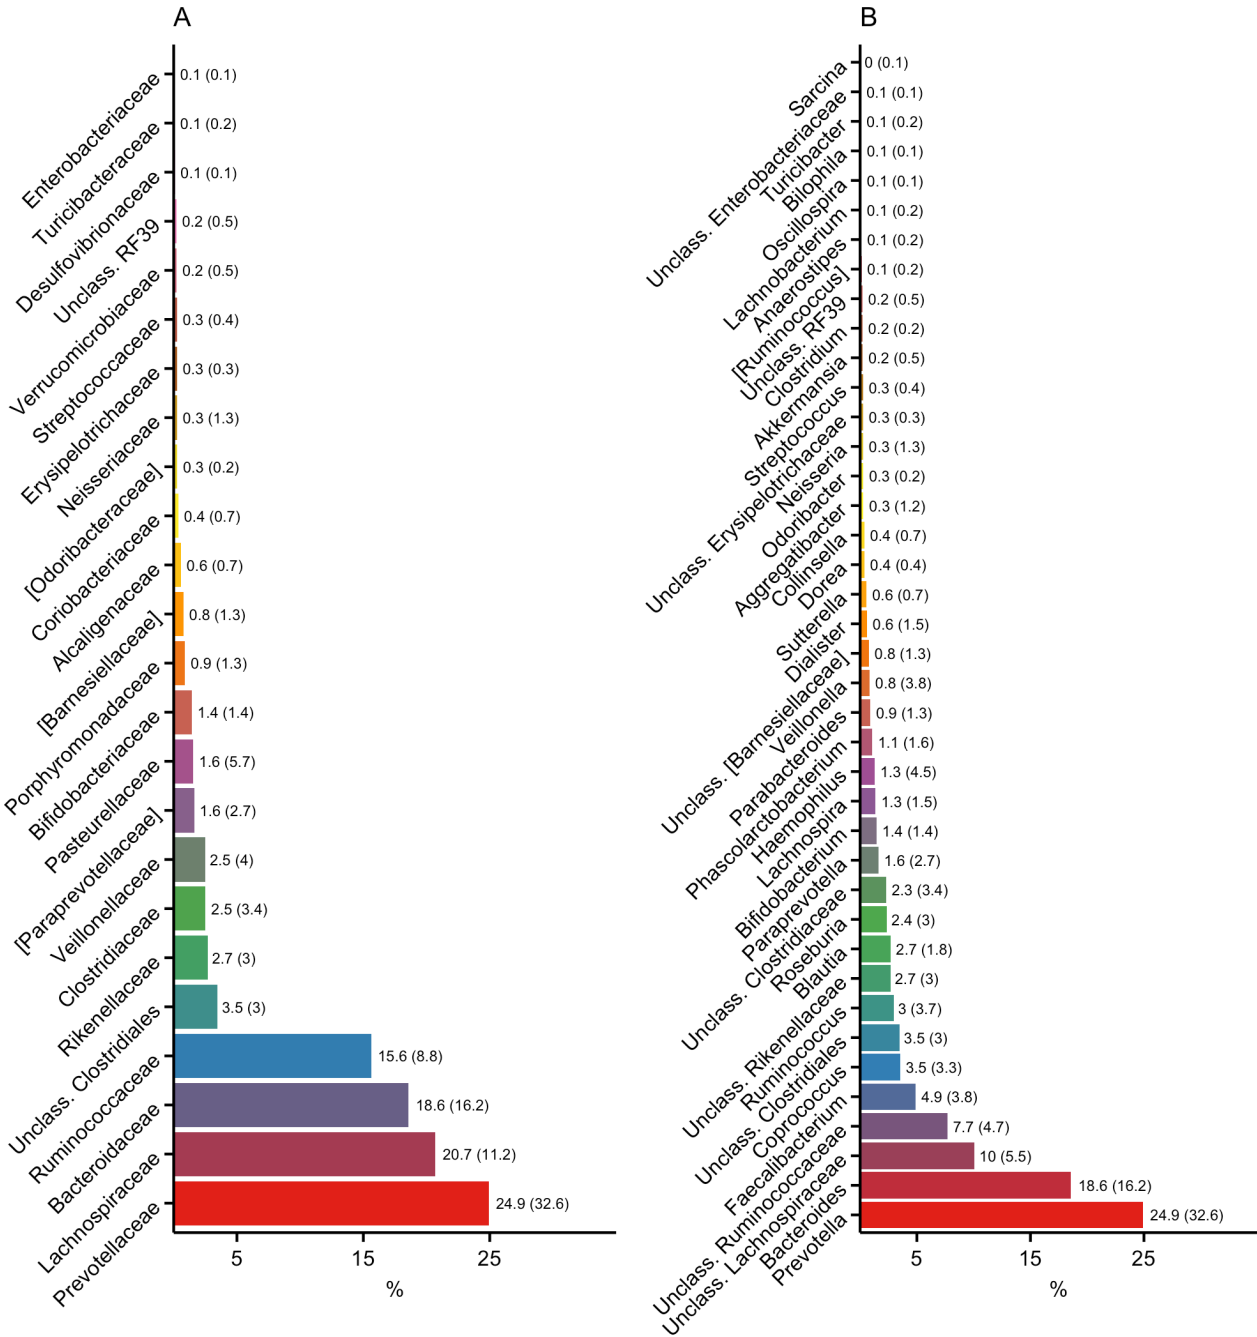

Mean relative abundance (SEM) at family [A] and genus [B] level of the 201 core OTUs in baseline samples from all participants.

FIGURE S4. FOREST PLOT OF INTERVENTION EFFECT IN EACH PERIOD

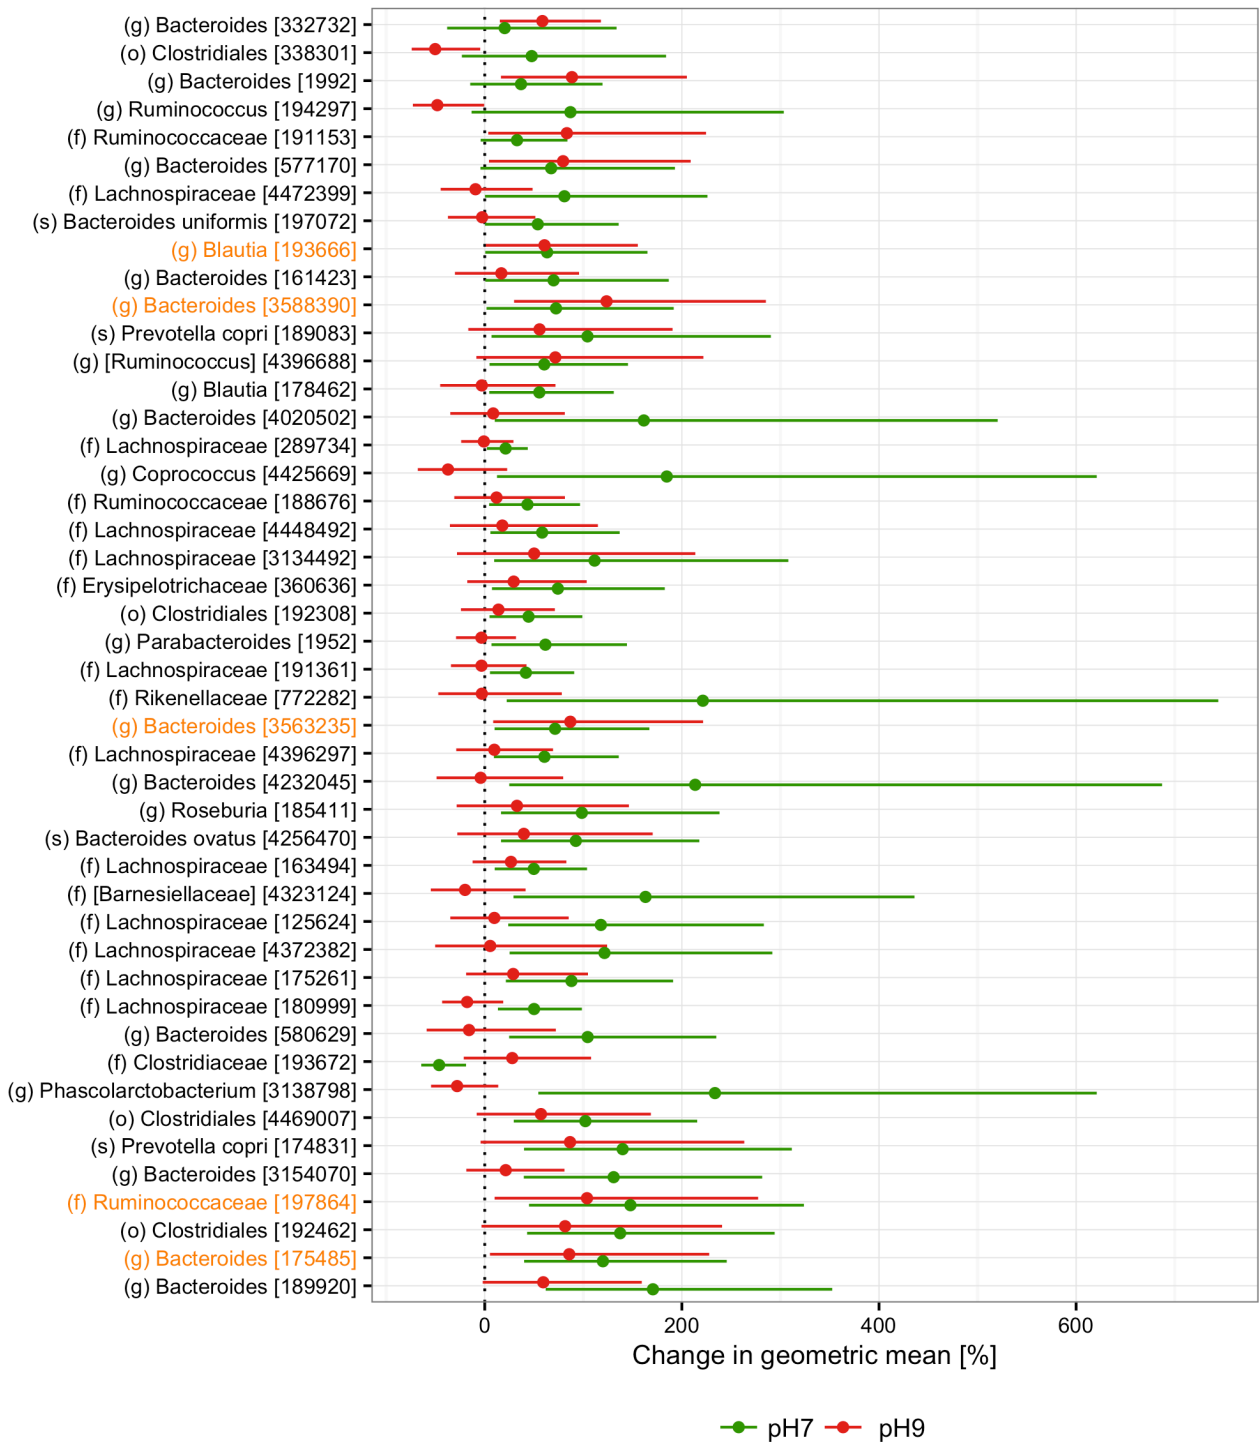

Forest plot of change in relative abundance (% change in geometric mean and 95% confidence intervals) during the individual interventions (pH7 and pH9). Taxonomy of OTUs [Greengenes ID] is given at the lowest classified rank. Only OTUs for which change in relative abundance was nominally significant ( $P < 0.05$ ) during either intervention are depicted. OTUs for which change was nominally significant during both interventions, with similar direction of effect, are highlighted. o, order. f, family. g, genus. s, species.

FIGURE S5. FOREST PLOT OF COMMON INTERVENTION EFFECTS

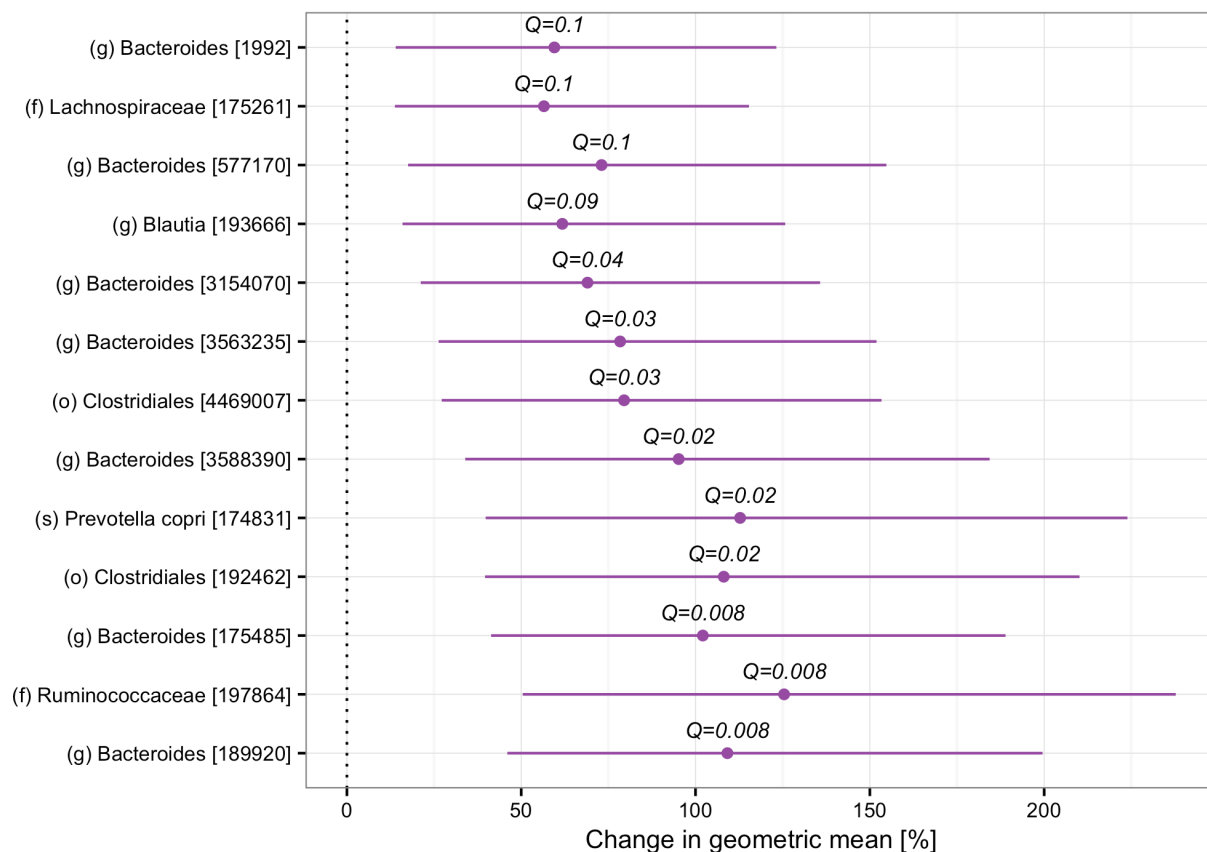

Forest plot of change in relative abundance (% change in geometric mean and 95% confidence intervals) when considering paired samples from the two interventions as technical replicates. Taxonomy of OTUs [Greengenes ID] is given at the lowest classified rank. Only OTUs for which change in relative abundance was nominally significant ( $P \leq 0.05$ ) during either intervention are depicted. Q-values generated *ad modum* Benjamini-Hochberg are shown. o, order. f, family. g, genus. s, species.

FIGURE S6. GLUCOSE AND INSULIN RESPONSE CURVES DURING ORAL GLUCOSE TOLERANCE TEST

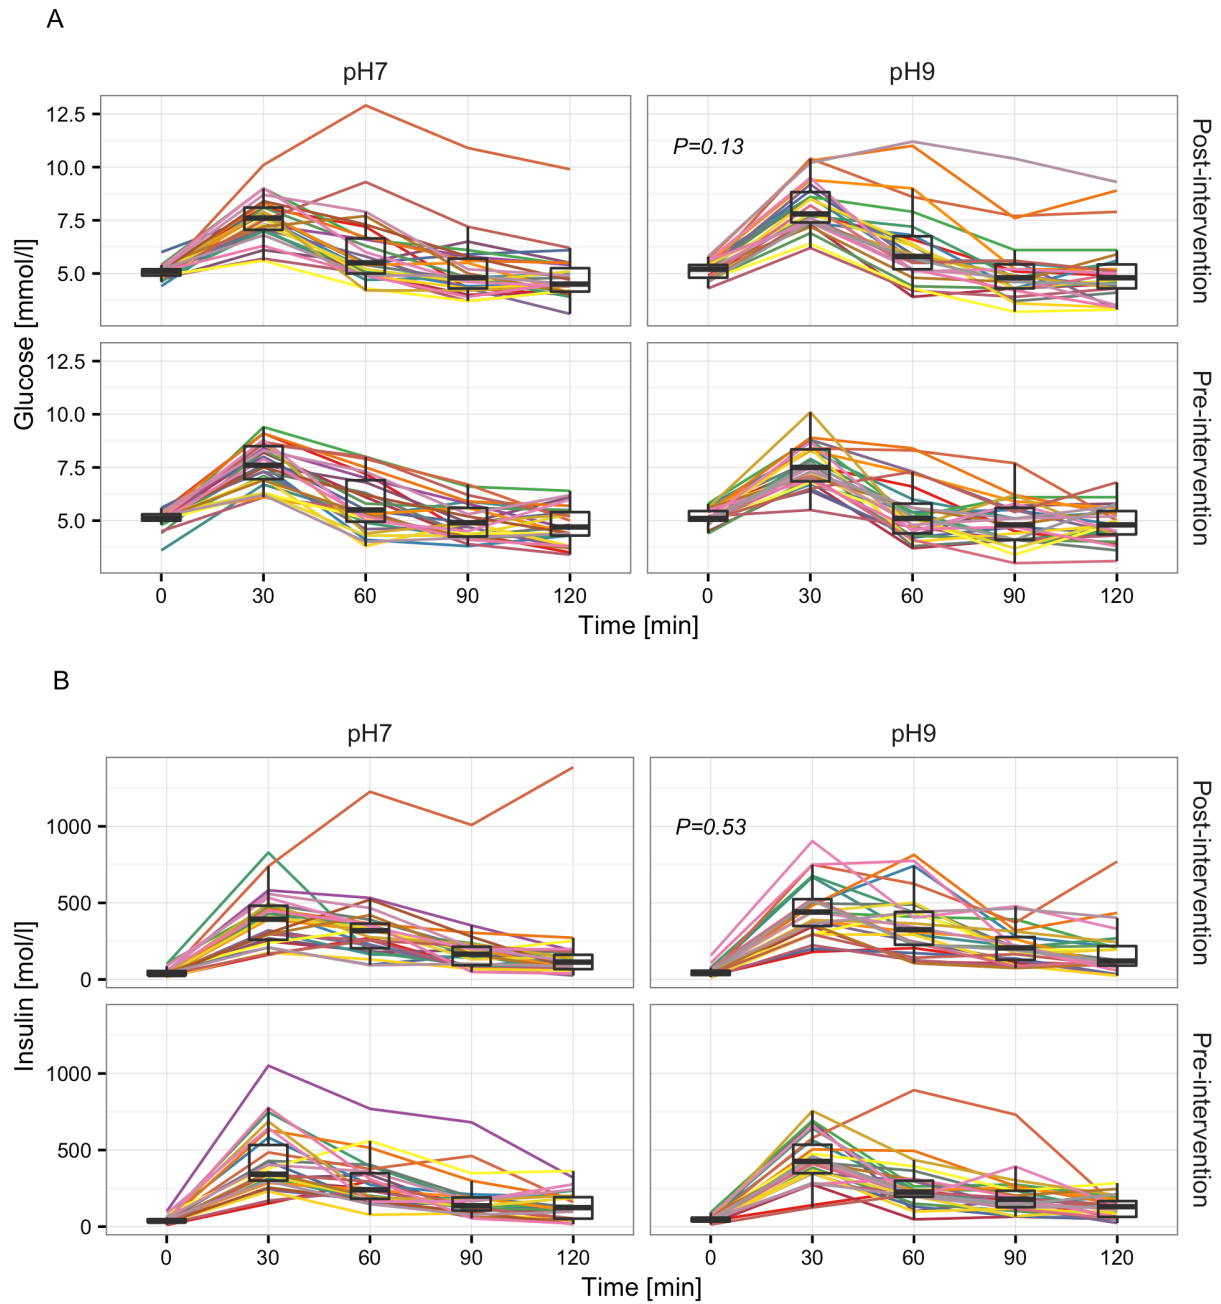

Individual glucose [A] and insulin [B] response curves during an oral glucose tolerance test faceted by type of intervention and sampling time. Each participant is represented by a unique line. Boxplots summarize measurements across participants at individual time-points. Treatment effect (alkaline relative to neutral water) was estimated using linear mixed modelling considering all sampled time-points (global test), and the respective P-values are indicated.

FIGURE S7. GASTRO-INTESTINAL SYMPTOMS

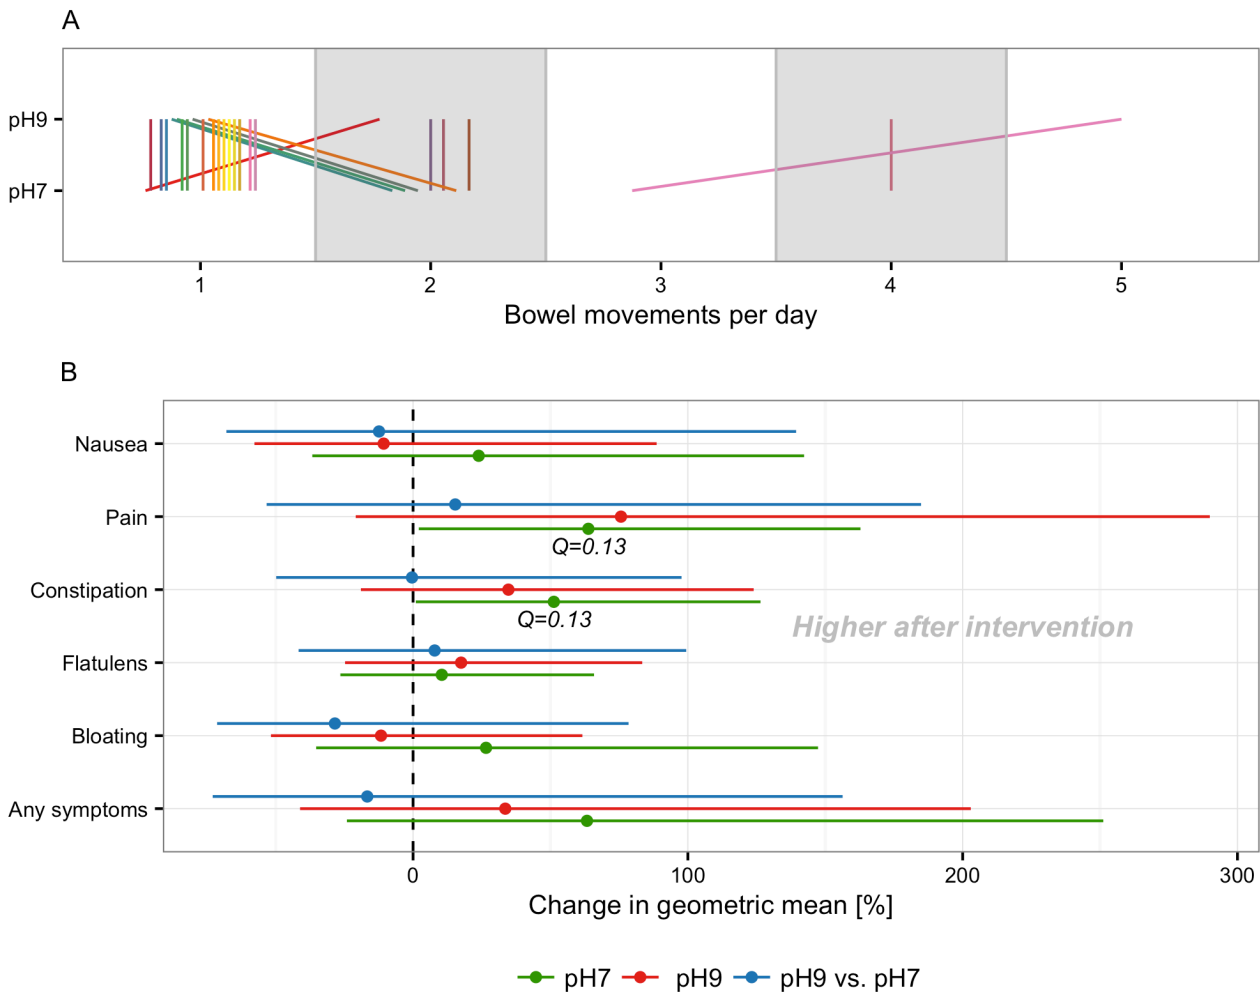

[A] Frequency of bowel movements was not significantly different (Wilcoxon signed-rank test,  $P=0.82$ ) at post-intervention visits (completers only). Each participant is represented by a unique line. [B] Forest plot of effect estimates (% change in geometric means) and 95% confidence intervals from linear mixed models. Estimates of the individual interventions (pH7 and pH9) and the contrast between them (pH9 vs. pH7) are depicted separately. Q-values generated *ad modum* Benjamini-Hochberg are shown in case of nominal significance.



Table S1. Indices of insulin resistance and beta-cell function

| Index                   | Description                                                                                | Calculation                                                                                                                                                                                                              |
|-------------------------|--------------------------------------------------------------------------------------------|--------------------------------------------------------------------------------------------------------------------------------------------------------------------------------------------------------------------------|
| BIGTT AIR <sub>30</sub> | Estimate of acute insulin response (0-30min) [1]                                           | $\exp[8.20 + (0.00178 \times I_0) + (0.00168 \times I_{30}) - (0.000383 \times I_{120}) + (0.314 \times G_0) - (0.109 \times G_{30}) + (0.0781 \times G_{120}) + (0.180 \times \text{sex}) + (0.032 \times \text{BMI})]$ |
| CIR                     | Corrected Insulin response; glucose stimulated insulin secretion                           | $(100 \times I_{30}) / (G_{30} \times (G_{30} - 3.89))$                                                                                                                                                                  |
| DI                      | Oral Disposition Index; $\beta$ -cell function adjusted for insulin sensitivity            | IGI/ISI <sub>Matsuda</sub>                                                                                                                                                                                               |
| HOMA2-B                 | Homeostatic Model Assessment of $\beta$ -cell function (fasting $\beta$ -cell function)[2] | Calculator available at: <a href="https://www.dtu.ox.ac.uk/homacalculator/">https://www.dtu.ox.ac.uk/homacalculator/</a>                                                                                                 |
| HOMA2-IR                | Homeostatic Model Assessment of Insulin Resistance (fasting $\beta$ -cell function)[2]     | Calculator available at: <a href="https://www.dtu.ox.ac.uk/homacalculator/">https://www.dtu.ox.ac.uk/homacalculator/</a>                                                                                                 |
| IGI                     | Insulinogenic Index; glucose stimulated insulin secretion                                  | $(I_{30} - I_0) / (G_{30} - G_0)$                                                                                                                                                                                        |
| ISI <sub>Matsuda</sub>  | Insulin sensitivity index; approximation of whole-body insulin sensitivity [3]             | $10000 / \sqrt{(G_0 \times I_0 \times G_{\text{mean}} \times I_{\text{mean}})}$                                                                                                                                          |
| MCR                     | Metabolic Clearance Rate [4]                                                               | $18.8 - 0.271 \times \text{BMI} - 0.0052 \times I_{120} - 0.27 \times G_{90}$                                                                                                                                            |
| OGIS                    | Oral Glucose Insulin Index; insulin sensitivity [5]                                        | Calculator available at: <a href="http://webmet.pd.cnr.it/ogis/">http://webmet.pd.cnr.it/ogis/</a>                                                                                                                       |
| PH1                     | First-phase insulin release [4]                                                            | $1.283 + 1.829 \cdot I_{30} - 138.7 \cdot G_{30} + 3.772 \cdot I_0$                                                                                                                                                      |
| PH2                     | Second-phase insulin release [4]                                                           | $287 + 0.4164 \cdot I_{30} - 26.07 \cdot G_{30} + 0.9226 \cdot I_0$                                                                                                                                                      |
| QUICKI                  | Quantitative insulin sensitivity check index [6]                                           | $1 / (\log(I_0) + \log(G_0))$                                                                                                                                                                                            |
| ISI <sub>Scumvoll</sub> | Insulin sensitivity index [7]                                                              | $1194 + 4.724 \times I_0 - 117.0 \times G_{60} + 1.414 \times I_{60}$                                                                                                                                                    |

TABLE S2. BETWEEN-PERIOD INTERVENTION EFFECT AT GENUS LEVEL

| OTU     | Level  | Taxonomy              | Estimate | 97.5 CI | 2.5 CI | P     | Q    |
|---------|--------|-----------------------|----------|---------|--------|-------|------|
| 3138798 | Genus  | Phascolarctobacterium | -76.4    | -41.6   | -90.5  | 0.002 | 0.07 |
| 4396235 | Genus  | Neisseria             | -60.4    | -10.4   | -82.5  | 0.03  | 0.52 |
| 4472721 | Genus  | Odoribacter           | -42.7    | 2.3     | -67.9  | 0.06  | 0.79 |
| 193672  | Family | Clostridiaceae        | 54.6     | 191.2   | -17.9  | 0.18  | 0.98 |
| 1952    | Genus  | Parabacteroides       | -28.2    | 19.2    | -56.8  | 0.2   | 0.98 |
| 197004  | Family | Lachnospiraceae       | -13.5    | 9.2     | -31.5  | 0.22  | 0.98 |
| 4453609 | Family | Rikenellaceae         | 54       | 209.9   | -23.5  | 0.23  | 0.98 |
| 368490  | Genus  | Turicibacter          | 75       | 406.1   | -39.5  | 0.3   | 0.98 |
| 3943186 | Genus  | Lachnobacterium       | 65.8     | 428     | -47.9  | 0.39  | 0.98 |
| 360636  | Family | Erysipelotrichaceae   | -23.6    | 44.5    | -59.6  | 0.41  | 0.98 |
| 195937  | Genus  | Blautia               | -11.4    | 19.1    | -34.1  | 0.42  | 0.98 |
| 4453501 | Genus  | Veillonella           | -23.8    | 48.8    | -61    | 0.43  | 0.98 |
| 4437359 | Genus  | Oscillospira          | 28.2     | 163.8   | -37.7  | 0.5   | 0.98 |
| 4306262 | Genus  | Akkermansia           | -26.3    | 80.2    | -69.9  | 0.5   | 0.98 |
| 163243  | Genus  | Ruminococcus          | 19.4     | 107     | -31.2  | 0.53  | 0.98 |
| 4363066 | Genus  | Aggregatibacter       | 50.2     | 438.5   | -58.1  | 0.53  | 0.98 |
| 175844  | Family | [Barnesiellaceae]     | -24.4    | 88.7    | -69.7  | 0.55  | 0.98 |
| 176980  | Genus  | Dorea                 | 17       | 97.6    | -30.7  | 0.56  | 0.98 |
| 4425214 | Genus  | Streptococcus         | -25.7    | 124.2   | -75.4  | 0.6   | 0.98 |
| 359872  | Genus  | Bilophila             | -12.6    | 70      | -55.1  | 0.69  | 0.98 |
| 4449236 | Genus  | Sutterella            | -14.7    | 99.4    | -63.5  | 0.71  | 0.98 |
| 4428714 | Order  | RF39                  | -21.3    | 190.8   | -78.7  | 0.72  | 0.98 |
| 199145  | Genus  | Faecalibacterium      | -6.1     | 40.5    | -37.3  | 0.76  | 0.98 |
| 4425669 | Genus  | Coprococcus           | -4.8     | 33      | -31.9  | 0.77  | 0.98 |
| 181432  | Genus  | Paraprevotella        | 12.5     | 149.3   | -49.3  | 0.77  | 0.98 |
| 4436552 | Genus  | Prevotella            | -10.5    | 94.9    | -58.9  | 0.78  | 0.98 |
| 3600504 | Genus  | Bacteroides           | -7.1     | 61.5    | -46.5  | 0.79  | 0.98 |
| 4396688 | Genus  | [Ruminococcus]        | 7.6      | 98.8    | -41.8  | 0.82  | 0.98 |
| 181059  | Order  | Clostridiales         | -3.3     | 30      | -28.1  | 0.82  | 0.98 |
| 782953  | Family | Enterobacteriaceae    | -12.3    | 216.8   | -75.7  | 0.84  | 0.98 |
| 4481613 | Genus  | Collinsella           | -5.6     | 73.7    | -48.7  | 0.85  | 0.98 |
| 403701  | Genus  | Dialister             | -7.3     | 126.6   | -62.1  | 0.87  | 0.98 |
| 298937  | Genus  | Sarcina               | -14.4    | 436.9   | -86.4  | 0.87  | 0.98 |
| 3931537 | Genus  | Clostridium           | -4.8     | 96.8    | -53.9  | 0.89  | 0.98 |
| 3537197 | Genus  | Anaerostipes          | -4.8     | 101.7   | -55    | 0.9   | 0.98 |
| 177515  | Genus  | Roseburia             | 2.2      | 75.7    | -40.6  | 0.94  | 0.98 |
| 4347159 | Genus  | Bifidobacterium       | 3.3      | 143.1   | -56.1  | 0.94  | 0.98 |
| 4477696 | Genus  | Haemophilus           | -3.4     | 164.1   | -64.7  | 0.95  | 0.98 |
| 176269  | Genus  | Lachnospira           | -1.6     | 86      | -48    | 0.96  | 0.98 |
| 265871  | Family | Ruminococcaceae       | -0.1     | 37.8    | -27.5  | 1     | 1    |

Estimates are change in geometric means and corresponding 95% confidence intervals from linear mixed models contrasting pH9 to pH7. Q values are calculated *ad modum* Benjamini-Hochberg. The taxonomic level to which an OTU is annotated and the corresponding name is presented.

TABLE S3. WITHIN-PERIOD INTERVENTION EFFECT AT GENUS LEVEL

| OTU     | Level  | Taxonomy              | Intervention | Estimate | 97.5 CI | 2.5 CI | P     | Q    |
|---------|--------|-----------------------|--------------|----------|---------|--------|-------|------|
| 197004  | Family | Lachnospiraceae       | pH7          | 21.4     | 37.7    | 7.0    | 0.003 | 0.06 |
| 3138798 | Genus  | Phascolarctobacterium | pH7          | 214.7    | 570.8   | 47.6   | 0.003 | 0.06 |
| 360636  | Family | Erysipelotrichaceae   | pH7          | 68.7     | 167.5   | 6.4    | 0.03  | 0.35 |
| 1952    | Genus  | Parabacteroides       | pH7          | 40.6     | 104.8   | -3.4   | 0.08  | 0.48 |
| 195937  | Genus  | Blautia               | pH7          | 16.0     | 37.1    | -1.9   | 0.08  | 0.48 |
| 4396235 | Genus  | Neisseria             | pH7          | 39.6     | 99.9    | -2.6   | 0.07  | 0.48 |
| 4396688 | Genus  | [Ruminococcus]        | pH7          | 35.5     | 88.6    | -2.7   | 0.07  | 0.48 |
| 163243  | Genus  | Ruminococcus          | pH7          | 22.7     | 74.1    | -13.5  | 0.25  | 0.54 |
| 175844  | Family | [Barnesiellaceae]     | pH7          | 57.8     | 205.5   | -18.5  | 0.18  | 0.54 |
| 176980  | Genus  | Dorea                 | pH7          | 19.4     | 62.4    | -12.2  | 0.26  | 0.54 |
| 177515  | Genus  | Roseburia             | pH7          | 27.5     | 71.4    | -5.2   | 0.11  | 0.54 |
| 193672  | Family | Clostridiaceae        | pH7          | -23.6    | 11.9    | -47.8  | 0.17  | 0.54 |
| 199145  | Genus  | Faecalibacterium      | pH7          | 14.0     | 40.0    | -7.2   | 0.21  | 0.54 |
| 3600504 | Genus  | Bacteroides           | pH7          | 23.9     | 71.5    | -10.5  | 0.20  | 0.54 |
| 3943186 | Genus  | Lachnobacterium       | pH7          | -35.8    | 27.5    | -67.6  | 0.21  | 0.54 |
| 4363066 | Genus  | Aggregatibacter       | pH7          | -40.3    | 39.4    | -74.5  | 0.23  | 0.54 |
| 4449236 | Genus  | Sutterella            | pH7          | 42.2     | 145.8   | -17.7  | 0.21  | 0.54 |
| 4453609 | Family | Rikenellaceae         | pH7          | -22.1    | 19.0    | -49.0  | 0.25  | 0.54 |
| 782953  | Family | Enterobacteriaceae    | pH7          | 69.9     | 325.6   | -32.2  | 0.26  | 0.54 |
| 4453501 | Genus  | Veillonella           | pH7          | 14.3     | 53.4    | -14.8  | 0.37  | 0.74 |
| 4306262 | Genus  | Akkermansia           | pH7          | 39.3     | 203.5   | -36.1  | 0.40  | 0.77 |
| 4472721 | Genus  | Odoribacter           | pH7          | 18.7     | 81.5    | -22.4  | 0.43  | 0.78 |
| 181059  | Order  | Clostridiales         | pH7          | 7.8      | 32.5    | -12.3  | 0.47  | 0.79 |
| 298937  | Genus  | Sarcina               | pH7          | 21.8     | 132.9   | -36.3  | 0.55  | 0.79 |
| 3537197 | Genus  | Anaerostipes          | pH7          | 14.7     | 92.5    | -31.6  | 0.60  | 0.79 |
| 359872  | Genus  | Bilophila             | pH7          | -12.2    | 45.6    | -47.0  | 0.61  | 0.79 |
| 368490  | Genus  | Turicibacter          | pH7          | -19.6    | 81.4    | -64.3  | 0.60  | 0.79 |
| 403701  | Genus  | Dialister             | pH7          | 23.5     | 115.0   | -29.1  | 0.46  | 0.79 |
| 4425669 | Genus  | Coproccoccus          | pH7          | 4.9      | 26.2    | -12.8  | 0.61  | 0.79 |
| 4428714 | Order  | RF39                  | pH7          | -26.8    | 136.4   | -77.3  | 0.60  | 0.79 |
| 4436552 | Genus  | Prevotella            | pH7          | 13.5     | 72.2    | -25.3  | 0.55  | 0.79 |
| 181432  | Genus  | Paraprevotella        | pH7          | -10.7    | 64.2    | -51.5  | 0.72  | 0.87 |
| 3931537 | Genus  | Clostridium           | pH7          | -9.9     | 51.9    | -46.6  | 0.69  | 0.87 |
| 4425214 | Genus  | Streptococcus         | pH7          | 13.3     | 146.7   | -48.0  | 0.75  | 0.89 |
| 4477696 | Genus  | Haemophilus           | pH7          | -8.8     | 83.2    | -54.6  | 0.80  | 0.91 |
| 265871  | Family | Ruminococcaceae       | pH7          | -1.9     | 16.6    | -17.5  | 0.83  | 0.92 |
| 176269  | Genus  | Lachnospira           | pH7          | 4.1      | 61.0    | -32.7  | 0.86  | 0.93 |

TABLE S3 (CONTINUED)

| OTU     | Level  | Taxonomy              | Intervention | Estimate | 97.5 CI | 2.5 CI | P    | Q    |
|---------|--------|-----------------------|--------------|----------|---------|--------|------|------|
| 4437359 | Genus  | Oscillospira          | pH7          | 3.1      | 69.4    | -37.3  | 0.91 | 0.95 |
| 4347159 | Genus  | Bifidobacterium       | pH7          | -0.8     | 71.3    | -42.5  | 0.98 | 0.99 |
| 4481613 | Genus  | Collinsella           | pH7          | -0.2     | 54.6    | -35.6  | 0.99 | 0.99 |
| 4428714 | Order  | RF39                  | pH9          | -38.4    | 3.9     | -63.4  | 0.07 | 0.87 |
| 4472721 | Genus  | Odoribacter           | pH9          | -29.7    | 3.1     | -52.1  | 0.07 | 0.87 |
| 4396235 | Genus  | Neisseria             | pH9          | -47.8    | 8.4     | -74.8  | 0.08 | 0.87 |
| 163243  | Genus  | Ruminococcus          | pH9          | 44.6     | 120.5   | -5.2   | 0.09 | 0.87 |
| 3138798 | Genus  | Phascolarctobacterium | pH9          | -29.4    | 11.0    | -55.1  | 0.13 | 0.94 |
| 176980  | Genus  | Dorea                 | pH9          | 38.9     | 118.2   | -11.5  | 0.15 | 0.94 |
| 4396688 | Genus  | [Ruminococcus]        | pH9          | 43.0     | 143.8   | -16.1  | 0.19 | 0.94 |
| 359872  | Genus  | Bilophila             | pH9          | -24.2    | 15.2    | -50.1  | 0.19 | 0.94 |
| 360636  | Family | Erysipelotrichaceae   | pH9          | 25.0     | 92.3    | -18.7  | 0.31 | 0.94 |
| 403701  | Genus  | Dialister             | pH9          | 36.5     | 156.5   | -27.4  | 0.33 | 0.94 |
| 368490  | Genus  | Turicibacter          | pH9          | 43.4     | 208.2   | -33.2  | 0.36 | 0.94 |
| 177515  | Genus  | Roseburia             | pH9          | 23.7     | 95.6    | -21.8  | 0.36 | 0.94 |
| 193672  | Family | Clostridiaceae        | pH9          | 22.9     | 101.7   | -25.1  | 0.41 | 0.94 |
| 4437359 | Genus  | Oscillospira          | pH9          | 26.5     | 124.9   | -28.9  | 0.42 | 0.94 |
| 4453609 | Family | Rikenellaceae         | pH9          | 26.4     | 125.6   | -29.2  | 0.43 | 0.94 |
| 4306262 | Genus  | Akkermansia           | pH9          | 18.2     | 79.3    | -22.0  | 0.43 | 0.94 |
| 782953  | Family | Enterobacteriaceae    | pH9          | 37.0     | 219.8   | -41.3  | 0.47 | 0.94 |
| 3600504 | Genus  | Bacteroides           | pH9          | 17.9     | 87.1    | -25.8  | 0.49 | 0.94 |
| 3537197 | Genus  | Anaerostipes          | pH9          | 19.2     | 108.2   | -31.7  | 0.54 | 0.94 |
| 3931537 | Genus  | Clostridium           | pH9          | -13.5    | 41.0    | -46.9  | 0.56 | 0.94 |
| 4453501 | Genus  | Veillonella           | pH9          | -16.0    | 53.0    | -53.9  | 0.57 | 0.94 |
| 4449236 | Genus  | Sutterella            | pH9          | 22.9     | 153.3   | -40.3  | 0.58 | 0.94 |
| 175844  | Family | [Barnesiellaceae]     | pH9          | 20.0     | 129.7   | -37.3  | 0.58 | 0.94 |
| 4425214 | Genus  | Streptococcus         | pH9          | -19.7    | 75.0    | -63.1  | 0.58 | 0.94 |
| 4477696 | Genus  | Haemophilus           | pH9          | -17.9    | 71.4    | -60.6  | 0.60 | 0.94 |
| 298937  | Genus  | Sarcina               | pH9          | 42.5     | 524.0   | -67.5  | 0.64 | 0.94 |
| 4363066 | Genus  | Aggregatibacter       | pH9          | -17.0    | 117.0   | -68.3  | 0.70 | 0.94 |
| 3943186 | Genus  | Lachnobacterium       | pH9          | 16.7     | 188.6   | -52.8  | 0.74 | 0.94 |
| 181432  | Genus  | Paraprevotella        | pH9          | 8.6      | 81.8    | -35.2  | 0.75 | 0.94 |
| 181059  | Order  | Clostridiales         | pH9          | 3.3      | 29.8    | -17.8  | 0.78 | 0.94 |
| 199145  | Genus  | Faecalibacterium      | pH9          | 4.5      | 48.8    | -26.6  | 0.81 | 0.94 |
| 197004  | Family | Lachnospiraceae       | pH9          | 2.5      | 26.7    | -17.0  | 0.82 | 0.94 |
| 4481613 | Genus  | Collinsella           | pH9          | -4.7     | 44.3    | -37.1  | 0.82 | 0.94 |
| 4425669 | Genus  | Coprococcus           | pH9          | -3.1     | 29.3    | -27.4  | 0.83 | 0.94 |

TABLE S3 (CONTINUED)

| <b>OTU</b> | <b>Level</b> | <b>Taxonomy</b> | <b>Intervention</b> | <b>Estimate</b> | <b>97.5 CI</b> | <b>2.5 CI</b> | <b>P</b> | <b>Q</b> |
|------------|--------------|-----------------|---------------------|-----------------|----------------|---------------|----------|----------|
| 4347159    | Genus        | Bifidobacterium | pH9                 | 6.6             | 108.7          | -45.6         | 0.85     | 0.94     |
| 265871     | Family       | Ruminococcaceae | pH9                 | -1.9            | 29.1           | -25.5         | 0.89     | 0.94     |
| 176269     | Genus        | Lachnospira     | pH9                 | 3.0             | 63.9           | -35.3         | 0.90     | 0.94     |
| 195937     | Genus        | Blautia         | pH9                 | 1.4             | 29.6           | -20.7         | 0.91     | 0.94     |
| 4436552    | Genus        | Prevotella      | pH9                 | 3.5             | 101.1          | -46.8         | 0.92     | 0.94     |
| 1952       | Genus        | Parabacteroides | pH9                 | -0.6            | 36.0           | -27.3         | 0.97     | 0.97     |

Estimates are percentual change in geometric means and corresponding 95% confidence intervals from linear mixed models of intervention effect within each period. Q Values are calculated ad modum Benjamini-Hochberg.
